# Supplementary material for: Landscape of lipidomic metabolites in gut-liver axis of Sprague–Dawley rats after oral exposure to titanium dioxide nanoparticles
Source: PubMed Central journal article supplement (PMC9351087; doi:10.1186/s12989-022-00484-9), 2022-08-03
Supplement: 12989_2022_484_MOESM1_ESM.pdf [file 12989_2022_484_MOESM1_ESM.pdf]

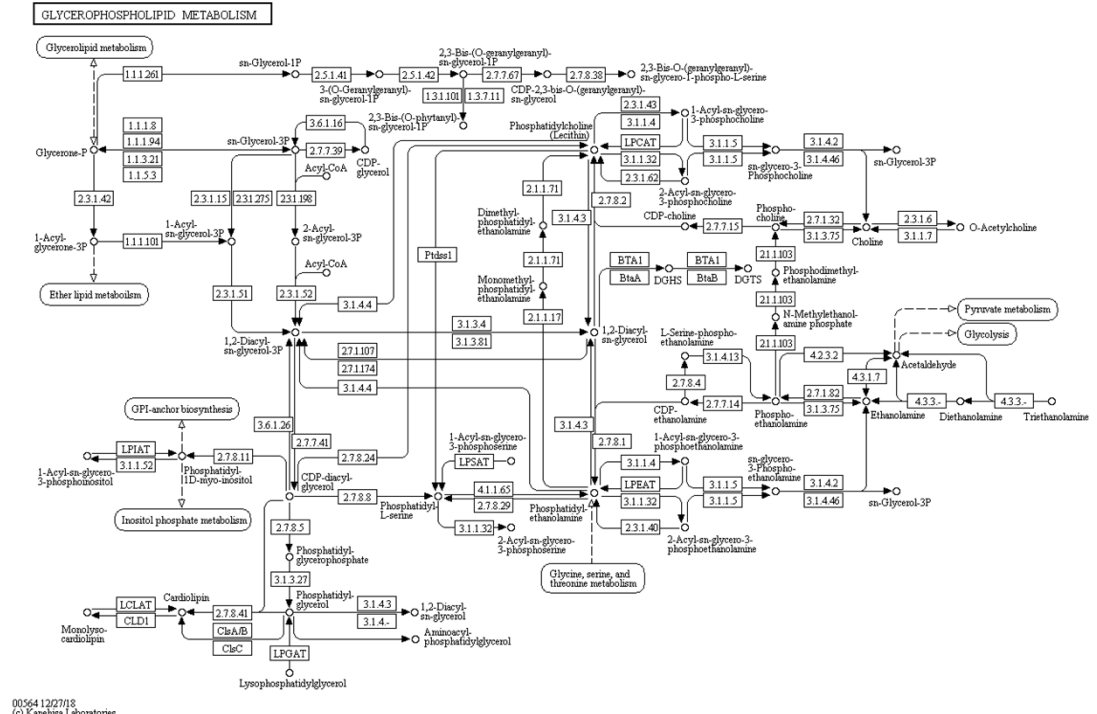

00564 12/27/18  
(c) Kanehisa Laboratories

Figure S1. KEGG pathway map of glycerophospholipid metabolism.

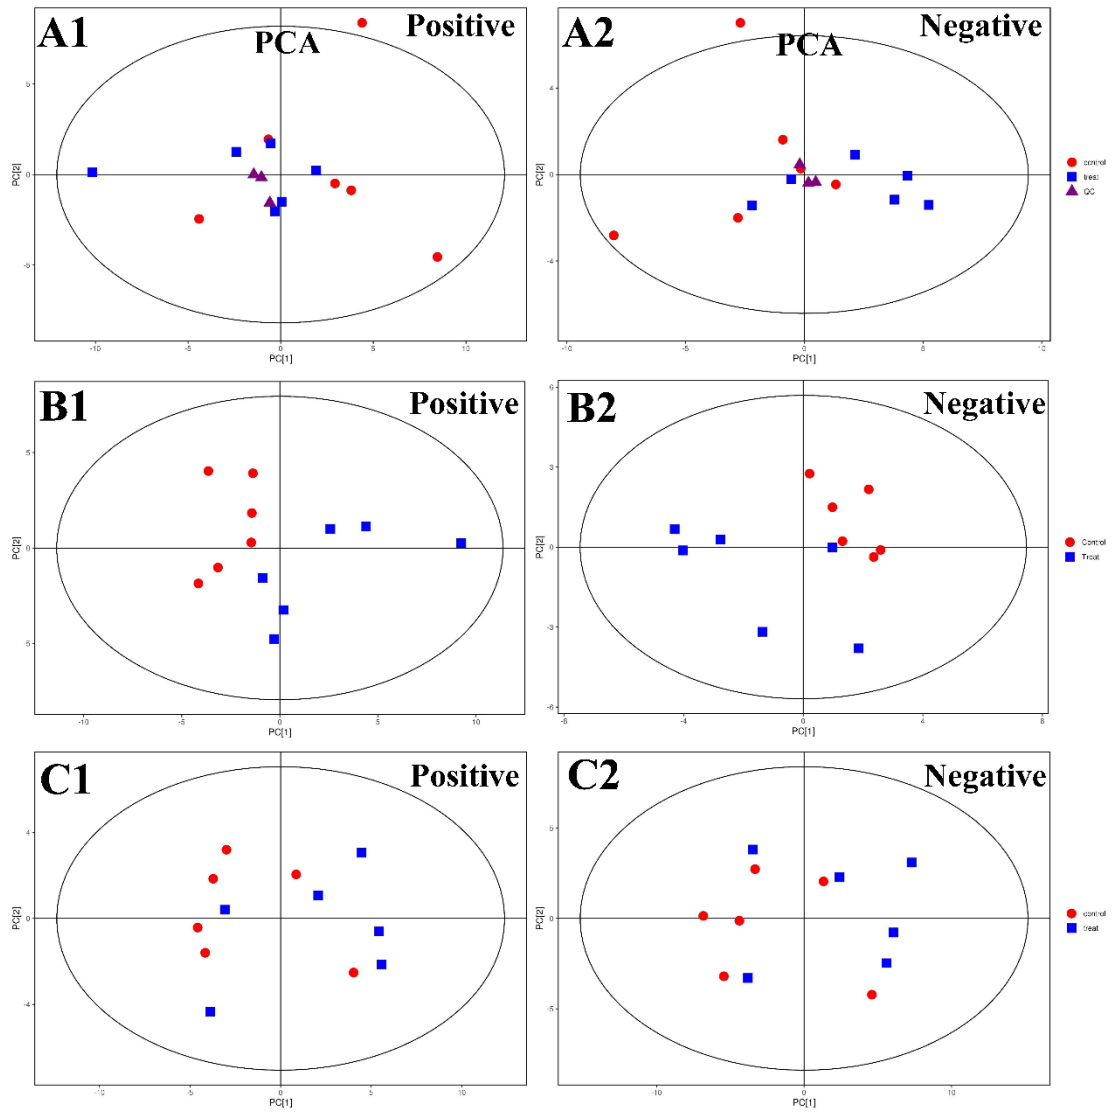

**Figure S2.** Score scatter plot for principal component analysis (PCA) model with total lipophilic metabolites and quality control (QC) samples. Samples included liver tissue (A1 and A2), serum (B1 and B2) and feces (C1 and C2). The X-axis PC[1] and Y-axis PC[2] represent the scores of the first and second principal components respectively. Most samples are in 95% confidence interval (Hotelling's t-squared ellipse). PCA plots showed the overall difference in metabolites between the treated group and the control group.

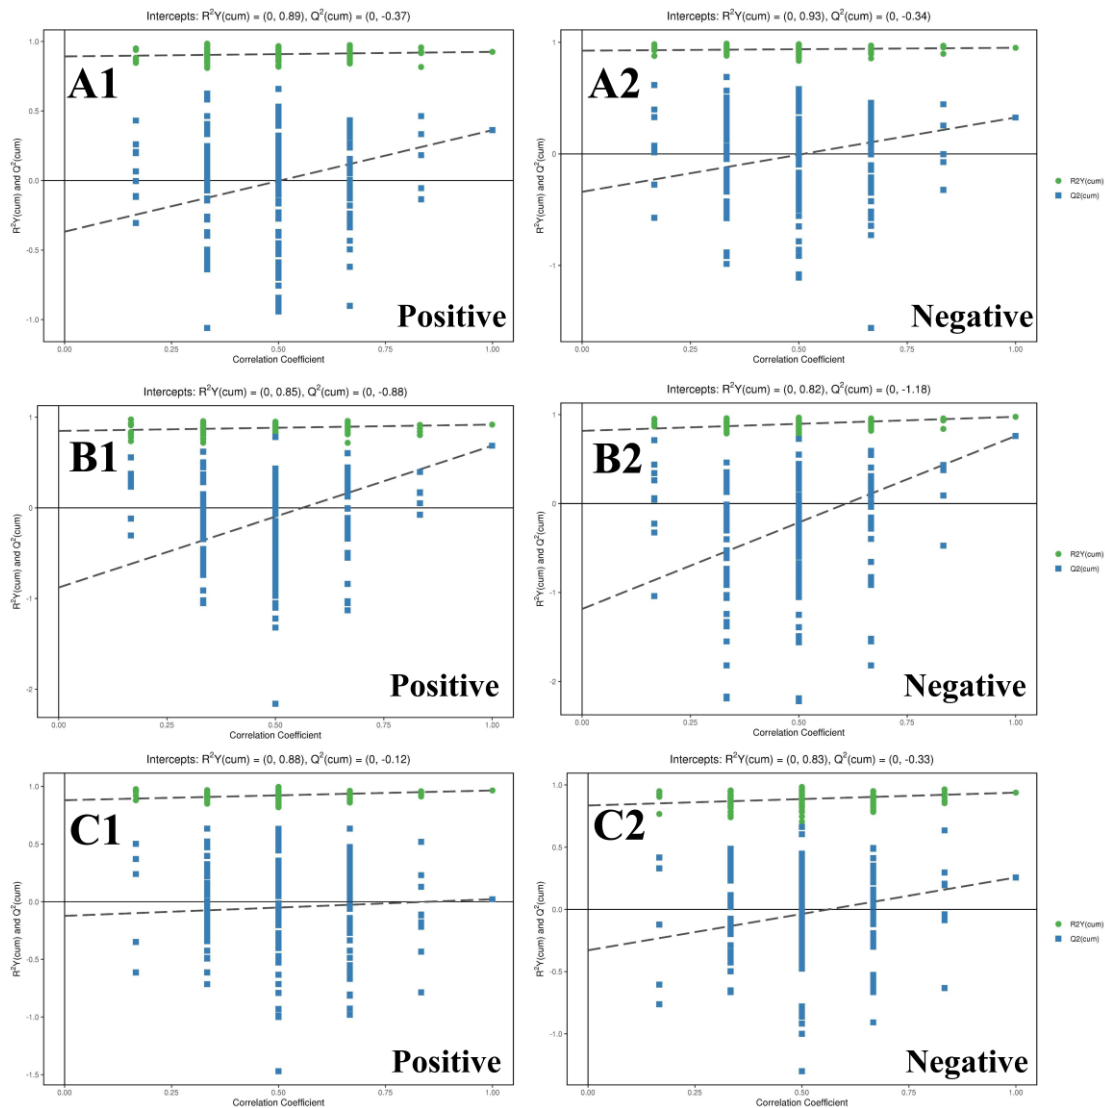

**Figure S3.** Permutation test of orthogonal projections to latent structures-discriminant analysis (OPLS-DA) model. Samples included liver tissue (A1 and A2), serum (B1 and B2) and feces (C1 and C2). The model parameter of R<sup>2</sup>Y was very close to 1, indicating that the established model conforms to the real situation of sample data. The model parameter of Q<sup>2</sup> is relatively close to 1, indicating that the model can better explain the differences between the two groups of samples.

**Table S1.** Hepatic differential lipophilic metabolites with good matches between the treated group (50 mg/kg) and the control group.

| No. | Mode     | MS2 name                                                                                                         | MS2 score | Retention time, RT (min) | molecular mass | VIP   | P value | FDR   | Fold Change | log <sub>2</sub> Fold Change |
|-----|----------|------------------------------------------------------------------------------------------------------------------|-----------|--------------------------|----------------|-------|---------|-------|-------------|------------------------------|
| 1   | positive | DG(18:2(9Z,12Z)/18:3(9Z,12Z,15Z)/0:0)[iso2]                                                                      | 1.000     | 688.556                  | 614.561        | 1.785 | 0.037   | 0.553 | 1.374       | 0.458                        |
| 2   | positive | PS(13:0/12:0)                                                                                                    | 0.997     | 154.508                  | 637.416        | 1.877 | 0.039   | 0.553 | 0.737       | -0.441                       |
| 3   | positive | Pregnanetriol                                                                                                    | 0.996     | 668.717                  | 337.272        | 1.822 | 0.041   | 0.553 | 1.444       | 0.530                        |
| 4   | positive | TG(18:3(9Z,12Z,15Z)/20:3(8Z,11Z,14Z)/22:5(7Z,10Z,13Z,16Z,19Z))[iso6]                                             | 0.995     | 824.285                  | 952.827        | 2.114 | 0.018   | 0.553 | 1.705       | 0.770                        |
| 5   | positive | Nervonic Ceramide                                                                                                | 0.995     | 716.279                  | 649.564        | 1.941 | 0.019   | 0.553 | 0.804       | -0.315                       |
| 6   | positive | Ubiquinone 8                                                                                                     | 0.995     | 698.598                  | 727.565        | 1.833 | 0.006   | 0.553 | 1.418       | 0.504                        |
| 7   | positive | Lyso-                                                                                                            | 0.994     | 135.170                  | 482.358        | 1.681 | 0.026   | 0.553 | 2.308       | 1.206                        |
| 8   | positive | TG(17:0/17:2(9Z,12Z)/17:2(9Z,12Z))[iso3]                                                                         | 0.994     | 719.883                  | 841.712        | 1.888 | 0.040   | 0.553 | 0.812       | -0.301                       |
| 9   | positive | 1-(14-methyl-pentadecanoyl)-2-(8-[3]-ladderane-octanyl)-sn-glycerol                                              | 0.991     | 691.708                  | 603.538        | 1.665 | 0.044   | 0.553 | 1.355       | 0.438                        |
| 10  | positive | PC(22:6(4Z,7Z,10Z,13Z,16Z,19Z)/20:3(5Z,8Z,11Z))                                                                  | 0.989     | 463.057                  | 856.571        | 2.125 | 0.017   | 0.553 | 1.418       | 0.503                        |
| 11  | positive | Met Asn Gly                                                                                                      | 0.986     | 41.842                   | 321.130        | 1.832 | 0.029   | 0.553 | 0.642       | -0.639                       |
| 12  | positive | PC(22:6(4Z,7Z,10Z,13Z,16Z,19Z)/20:4(5Z,8Z,11Z,14Z))                                                              | 0.984     | 464.101                  | 854.565        | 2.078 | 0.019   | 0.553 | 1.398       | 0.483                        |
| 13  | positive | Lys Lys Lys Phe                                                                                                  | 0.981     | 165.453                  | 550.385        | 1.546 | 0.043   | 0.553 | 0.754       | -0.407                       |
| 14  | positive | N-(5-hydroxy-pentyl) arachidonoyl amine                                                                          | 0.979     | 74.041                   | 390.336        | 2.248 | 0.005   | 0.553 | 1.884       | 0.914                        |
| 15  | positive | PC(O-16:1(11Z)/2:0)                                                                                              | 0.979     | 113.157                  | 522.352        | 2.106 | 0.012   | 0.553 | 0.696       | -0.524                       |
| 16  | positive | Cer(d18:0/24:0(2OH))                                                                                             | 0.968     | 733.905                  | 668.651        | 1.743 | 0.010   | 0.553 | 0.818       | -0.290                       |
| 17  | positive | 2-[2-[(3E,5E)-7-hydroxy-3,5-dimethyl-2-oxoocta-3,5-dienyl]-6-oxooxan-4-yl]acetamide                              | 0.966     | 50.529                   | 323.198        | 1.740 | 0.049   | 0.553 | 0.660       | -0.600                       |
| 18  | positive | 2-[[[(2R)-2,3-dihydroxypropoxy]-hydroxyphosphoryl]oxyethyl-trimethylazanium                                      | 0.942     | 41.408                   | 257.146        | 2.383 | 0.007   | 0.553 | 0.236       | -2.081                       |
| 19  | positive | PC(20:3(8Z,11Z,14Z)/0:0)                                                                                         | 0.931     | 85.344                   | 546.345        | 1.857 | 0.031   | 0.553 | 0.710       | -0.494                       |
| 20  | positive | PI(17:0/20:4(5Z,8Z,11Z,14Z))                                                                                     | 0.864     | 592.649                  | 891.572        | 1.625 | 0.048   | 0.553 | 0.649       | -0.623                       |
| 21  | positive | 2,3-dihydroxypropyl octadecanoate                                                                                | 0.842     | 258.192                  | 359.314        | 1.631 | 0.030   | 0.553 | 1.224       | 0.291                        |
| 22  | positive | DG(12:0/17:2(9Z,12Z)/0:0)[iso2]                                                                                  | 0.823     | 659.443                  | 523.571        | 2.315 | 0.004   | 0.553 | 0.700       | -0.514                       |
| 23  | positive | PC(O-18:2(9Z,12Z)/2:0)                                                                                           | 0.806     | 120.696                  | 548.370        | 1.974 | 0.014   | 0.553 | 0.662       | -0.595                       |
| 24  | positive | ML-9                                                                                                             | 0.729     | 58.400                   | 325.180        | 2.367 | 0.021   | 0.553 | 0.452       | -1.144                       |
| 25  | positive | [2,5,7,8-tetramethyl-2-(4,8,12-trimethyltridecyl)-3,4-dihydrochromen-6-yl] acetate                               | 0.700     | 252.291                  | 490.425        | 2.261 | 0.003   | 0.553 | 2.126       | 1.088                        |
| 26  | positive | Spisulosine                                                                                                      | 0.661     | 40.679                   | 287.084        | 1.839 | 0.040   | 0.553 | 0.386       | -1.374                       |
| 27  | positive | TG(14:1(9Z)/15:1(9Z)/18:4(6Z,9Z,12Z,15Z))[iso6]                                                                  | 0.562     | 655.219                  | 781.083        | 1.761 | 0.042   | 0.553 | 1.437       | 0.523                        |
| 28  | positive | PS(18:1(9Z)/0:0)                                                                                                 | 0.519     | 113.157                  | 523.356        | 2.098 | 0.012   | 0.553 | 0.699       | -0.517                       |
| 29  | positive | Nandrolone phenpropionate                                                                                        | 0.413     | 109.329                  | 407.254        | 1.647 | 0.041   | 0.553 | 0.612       | -0.709                       |
| 30  | positive | 1alpha,25-dihydroxy-3-deoxy-3-thiavitamin D3 3-oxide / 1alpha,25-dihydroxy-3-deoxy-3-thiacholecalciferol 3-oxide | 0.362     | 161.668                  | 435.285        | 1.847 | 0.006   | 0.553 | 0.587       | -0.767                       |

**Table S1.** Hepatic differential lipophilic metabolites with good matches between the treated group (50 mg/kg) and the control group. **(Continued)**

| No. | Mode     | MS2 name                                                                                                          | MS2 score | Retention time, RT (min) | molecular mass | VIP   | P value | FDR   | Fold Change | log <sub>2</sub> Fold Change |
|-----|----------|-------------------------------------------------------------------------------------------------------------------|-----------|--------------------------|----------------|-------|---------|-------|-------------|------------------------------|
| 31  | negative | 20-Hydroxy-PGF2a                                                                                                  | 0.981     | 49.662                   | 369.230        | 1.751 | 0.040   | 0.549 | 0.630       | -0.667                       |
| 32  | negative | [3-hexadecanoyloxy-2-[(4Z,7Z)-octadeca-4,7-dienoyl]oxypropyl] 2-(trimethylazaniumyl)ethyl phosphate               | 0.865     | 641.220                  | 817.581        | 1.681 | 0.045   | 0.549 | 0.820       | -0.287                       |
| 33  | negative | [(2R)-1-[2-aminoethoxy(hydroxy)phosphoryl]oxy-3-hexadecanoyloxypropan-2-yl] (9Z,12Z)-octadeca-9,12-dienoate       | 0.757     | 633.782                  | 714.512        | 1.930 | 0.019   | 0.549 | 1.176       | 0.234                        |
| 34  | negative | [3-hexadecanoyloxy-2-[(4Z,7Z,10Z,13Z)-icosa-4,7,10,13-tetraenoyl]oxypropyl] 2-(trimethylazaniumyl)ethyl phosphate | 0.732     | 643.242                  | 839.586        | 1.826 | 0.029   | 0.549 | 1.283       | 0.360                        |

DG: Diacylglycerol; PS: Phosphatidylserine; TG: Triacylglycerol; PC: Phosphatidylcholine; PI: phosphatidylinositol. Red represents the concentration of metabolite in the treat group is higher than the control group, and blue represents the concentration of metabolite in the treat group is lower than the control group.

**Table S2.** Serum differential lipophilic metabolites with good matches between the treated group (50 mg/kg) and the control group.

| No. | Mode     | MS2 name                                               | MS2 score | Retention time, RT (min) | molecular mass | VIP   | P value | FDR   | Fold Change | log <sub>2</sub> Fold Change |
|-----|----------|--------------------------------------------------------|-----------|--------------------------|----------------|-------|---------|-------|-------------|------------------------------|
| 1   | positive | Val Arg Ser                                            | 1.000     | 45.005                   | 361.218        | 1.686 | 0.032   | 0.170 | 1.865       | 0.899                        |
| 2   | positive | 12-HETE                                                | 0.999     | 80.200                   | 303.230        | 1.584 | 0.003   | 0.081 | 0.449       | -1.154                       |
| 3   | positive | DG(16:1(9Z)/22:5(7Z,10Z,13Z,16Z,19Z)/0:0)[iso2]        | 0.997     | 670.377                  | 641.509        | 1.587 | 0.046   | 0.180 | 0.564       | -0.825                       |
| 4   | positive | PE(22:4(7Z,10Z,13Z,16Z)/21:0)                          | 0.996     | 667.409                  | 838.628        | 1.082 | 0.027   | 0.166 | 1.292       | 0.369                        |
| 5   | positive | PC(22:4(7Z,10Z,13Z,16Z)/14:0)                          | 0.995     | 609.008                  | 782.567        | 1.794 | 0.001   | 0.055 | 1.550       | 0.632                        |
| 6   | positive | PC(22:4(7Z,10Z,13Z,16Z)/16:0)                          | 0.993     | 650.851                  | 810.599        | 1.862 | 0.000   | 0.007 | 1.347       | 0.430                        |
| 7   | positive | PE-NMe2(16:0/20:4(5Z,8Z,11Z,14Z))[S]                   | 0.992     | 557.842                  | 768.549        | 1.566 | 0.009   | 0.128 | 1.853       | 0.890                        |
| 8   | positive | PC(O-18:2(9Z,12Z)/0:0)[U]                              | 0.991     | 169.602                  | 506.358        | 1.352 | 0.032   | 0.170 | 0.836       | -0.258                       |
| 9   | positive | PC(19:1(9Z)/17:2(9Z,12Z))                              | 0.991     | 618.823                  | 784.576        | 1.328 | 0.023   | 0.162 | 1.178       | 0.236                        |
| 10  | positive | 1-heptadecanoyl-sn-glycero-3-phosphocholine            | 0.989     | 135.903                  | 510.354        | 1.503 | 0.007   | 0.117 | 0.738       | -0.439                       |
| 11  | positive | PC(22:1(11Z)/12:0)                                     | 0.989     | 648.742                  | 760.577        | 1.308 | 0.042   | 0.176 | 1.153       | 0.206                        |
| 12  | positive | TG(18:0/18:4(6Z,9Z,12Z,15Z)/18:4(6Z,9Z,12Z,15Z))[iso3] | 0.988     | 786.576                  | 875.706        | 1.721 | 0.021   | 0.159 | 0.575       | -0.797                       |
| 13  | positive | PC(20:1(11Z)/12:0)                                     | 0.988     | 610.953                  | 732.550        | 1.077 | 0.028   | 0.167 | 1.383       | 0.468                        |
| 14  | positive | PC(24:1(15Z)/18:4(6Z,9Z,12Z,15Z))                      | 0.988     | 670.534                  | 864.644        | 1.892 | 0.000   | 0.012 | 2.020       | 1.015                        |
| 15  | positive | PI(22:0/21:0)                                          | 0.987     | 767.352                  | 965.695        | 1.446 | 0.032   | 0.170 | 1.209       | 0.274                        |
| 16  | positive | PC(O-16:0/2:0)                                         | 0.987     | 169.244                  | 524.368        | 1.746 | 0.003   | 0.087 | 0.829       | -0.270                       |
| 17  | positive | PC(18:0/14:0)                                          | 0.985     | 652.853                  | 734.566        | 1.709 | 0.009   | 0.132 | 1.360       | 0.443                        |
| 18  | positive | PC(18:2(9Z,12Z)/22:1(11Z))                             | 0.984     | 672.789                  | 840.639        | 1.276 | 0.007   | 0.119 | 1.401       | 0.486                        |
| 19  | positive | Ala Arg Pro                                            | 0.984     | 47.489                   | 343.210        | 1.176 | 0.028   | 0.167 | 0.601       | -0.734                       |
| 20  | positive | TG(12:0/20:4(5Z,8Z,11Z,14Z)/22:3(10Z,13Z,16Z))[iso6]   | 0.984     | 802.383                  | 877.723        | 1.561 | 0.022   | 0.161 | 0.718       | -0.477                       |
| 21  | positive | TG(12:0/20:3(8Z,11Z,14Z)/22:3(10Z,13Z,16Z))[iso6]      | 0.983     | 818.654                  | 879.738        | 1.653 | 0.015   | 0.148 | 0.569       | -0.814                       |
| 22  | positive | PC(24:1(15Z)/18:3(6Z,9Z,12Z))                          | 0.981     | 690.242                  | 866.660        | 1.605 | 0.002   | 0.074 | 1.551       | 0.633                        |
| 23  | positive | 3alpha-Acetomethoxy-11alpha-oxo-12-ursen-24-oic acid   | 0.981     | 169.399                  | 527.377        | 1.735 | 0.005   | 0.101 | 0.802       | -0.318                       |
| 24  | positive | TG(18:2(9Z,12Z)/18:0/18:3(9Z,12Z,15Z))[iso6]           | 0.981     | 837.016                  | 881.751        | 1.559 | 0.027   | 0.166 | 0.619       | -0.692                       |
| 25  | positive | PC(22:1(11Z)/20:5(5Z,8Z,11Z,14Z,17Z))                  | 0.980     | 660.084                  | 862.626        | 1.321 | 0.031   | 0.169 | 1.219       | 0.285                        |
| 26  | positive | N-stearoyl tyrosine                                    | 0.979     | 64.735                   | 448.336        | 1.856 | 0.004   | 0.094 | 1.541       | 0.624                        |
| 27  | positive | PC(22:2(13Z,16Z)/17:2(9Z,12Z))                         | 0.977     | 662.109                  | 824.613        | 1.664 | 0.001   | 0.068 | 1.562       | 0.643                        |
| 28  | positive | PC(20:3(8Z,11Z,14Z)/17:1(9Z))                          | 0.974     | 636.918                  | 796.584        | 1.302 | 0.048   | 0.181 | 1.349       | 0.432                        |
| 29  | positive | Oleamide                                               | 0.972     | 163.431                  | 282.278        | 1.157 | 0.035   | 0.172 | 0.668       | -0.582                       |
| 30  | positive | PE(22:1(11Z)/20:2(11Z,14Z))                            | 0.972     | 665.540                  | 826.624        | 1.279 | 0.006   | 0.115 | 1.347       | 0.430                        |
| 31  | positive | 11-cis retro-gamma-retinal                             | 0.970     | 79.854                   | 285.220        | 1.578 | 0.003   | 0.084 | 0.453       | -1.142                       |
| 32  | positive | PC(O-16:0/3:1(2E))                                     | 0.967     | 139.567                  | 536.369        | 1.846 | 0.000   | 0.038 | 0.644       | -0.634                       |
| 33  | positive | Estradiol-17-phenylpropionate                          | 0.960     | 50.435                   | 405.237        | 1.899 | 0.012   | 0.142 | 1.682       | 0.750                        |
| 34  | positive | LysoPE(20:1(11Z)/0:0)                                  | 0.959     | 97.558                   | 508.339        | 1.649 | 0.002   | 0.080 | 0.688       | -0.540                       |
| 35  | positive | C22 Sulfatide                                          | 0.956     | 59.585                   | 864.623        | 1.784 | 0.029   | 0.168 | 2.097       | 1.068                        |

**Table S2.** Serum differential lipophilic metabolites with good matches between the treated group (50 mg/kg) and the control group. **(Continued)**

| No. | Mode     | MS2 name                                  | MS2 score | Retention time, RT (min) | molecular mass | VIP   | P value | FDR   | Fold Change | log <sub>2</sub> Fold Change |
|-----|----------|-------------------------------------------|-----------|--------------------------|----------------|-------|---------|-------|-------------|------------------------------|
| 36  | positive | PE-NMe(16:0/16:0)                         | 0.954     | 605.062                  | 706.525        | 1.817 | 0.000   | 0.036 | 1.366       | 0.450                        |
| 37  | positive | 2-amino-octadecanoic acid                 | 0.954     | 148.657                  | 300.289        | 1.709 | 0.006   | 0.112 | 0.708       | -0.499                       |
| 38  | positive | PC(20:3(8Z,11Z,14Z)/0:0)                  | 0.940     | 91.676                   | 546.348        | 1.305 | 0.009   | 0.132 | 0.625       | -0.679                       |
| 39  | positive | LysoPC(P-16:0)                            | 0.931     | 128.628                  | 480.341        | 1.399 | 0.008   | 0.125 | 0.775       | -0.368                       |
| 40  | positive | lysoPC(26:1(5Z))                          | 0.923     | 455.455                  | 634.477        | 1.612 | 0.032   | 0.170 | 1.336       | 0.418                        |
| 41  | positive | Tricosanamide                             | 0.905     | 738.567                  | 636.626        | 1.042 | 0.037   | 0.173 | 1.484       | 0.569                        |
| 42  | positive | Lauryl diethanolamide                     | 0.892     | 66.820                   | 288.249        | 1.636 | 0.001   | 0.066 | 0.567       | -0.818                       |
| 43  | positive | PE(22:0/0:0)                              | 0.889     | 199.073                  | 538.386        | 1.345 | 0.014   | 0.147 | 0.753       | -0.410                       |
| 44  | positive | PC(22:6(4E,7E,10E,13E,16E,19E)/0:0)[U]    | 0.888     | 78.873                   | 568.337        | 1.400 | 0.013   | 0.145 | 0.730       | -0.454                       |
| 45  | positive | Lyso-PAF C-18                             | 0.860     | 205.212                  | 510.391        | 1.813 | 0.000   | 0.036 | 0.610       | -0.714                       |
| 46  | positive | Oleoyl Ethyl Amide                        | 0.858     | 240.921                  | 310.309        | 1.375 | 0.039   | 0.174 | 0.460       | -1.120                       |
| 47  | positive | Asn Arg Arg Val                           | 0.855     | 84.199                   | 544.336        | 1.388 | 0.008   | 0.126 | 0.897       | -0.156                       |
| 48  | positive | PC(22:5(4Z,7Z,10Z,13Z,16Z)/20:2(11Z,14Z)) | 0.855     | 640.460                  | 860.611        | 1.406 | 0.020   | 0.158 | 1.352       | 0.435                        |
| 49  | positive | Enigmol                                   | 0.855     | 99.634                   | 302.304        | 1.245 | 0.048   | 0.181 | 0.705       | -0.504                       |
| 50  | positive | PC(22:6(4Z,7Z,10Z,13Z,16Z,19Z)/19:1(9Z))  | 0.853     | 665.925                  | 846.605        | 1.561 | 0.009   | 0.130 | 1.398       | 0.483                        |
| 51  | positive | PC(22:6(4Z,7Z,10Z,13Z,16Z,19Z)/19:0)      | 0.836     | 656.395                  | 848.622        | 1.266 | 0.039   | 0.174 | 1.244       | 0.315                        |
| 52  | positive | C22-OH Sulfatide                          | 0.823     | 53.259                   | 880.618        | 1.915 | 0.031   | 0.169 | 2.113       | 1.079                        |
| 53  | positive | PC(24:1(15Z)/22:4(7Z,10Z,13Z,16Z))        | 0.820     | 717.793                  | 920.699        | 2.024 | 0.000   | 0.030 | 2.024       | 1.017                        |
| 54  | positive | sn-Glycero-3-phosphocholine               | 0.811     | 42.073                   | 258.110        | 1.290 | 0.045   | 0.179 | 0.577       | -0.793                       |
| 55  | positive | Lys Thr Arg Arg                           | 0.792     | 196.008                  | 560.367        | 1.529 | 0.015   | 0.149 | 0.622       | -0.686                       |
| 56  | positive | PC(24:0/20:5(5Z,8Z,11Z,14Z,17Z))          | 0.743     | 693.656                  | 892.673        | 1.962 | 0.000   | 0.007 | 2.779       | 1.475                        |
| 57  | positive | PC(P-15:0/0:0)                            | 0.720     | 209.325                  | 466.328        | 1.811 | 0.001   | 0.045 | 0.632       | -0.661                       |
| 58  | positive | PC(22:6(4Z,7Z,10Z,13Z,16Z,19Z)/15:1(9Z))  | 0.712     | 557.842                  | 790.532        | 1.592 | 0.004   | 0.089 | 2.013       | 1.009                        |
| 59  | positive | Oleoyl Ethanolamide-d2                    | 0.690     | 224.540                  | 328.319        | 1.522 | 0.042   | 0.177 | 0.760       | -0.396                       |
| 60  | positive | Scytophycin D                             | 0.690     | 577.599                  | 844.524        | 1.519 | 0.007   | 0.118 | 1.235       | 0.304                        |
| 61  | positive | PC(O-16:0/15:0)                           | 0.670     | 609.938                  | 706.571        | 1.349 | 0.011   | 0.138 | 1.203       | 0.267                        |
| 62  | positive | CerP(d18:1/12:0)                          | 0.619     | 216.353                  | 562.416        | 1.180 | 0.037   | 0.173 | 0.821       | -0.285                       |
| 63  | positive | PC(18:2(9Z,12Z)/0:0)                      | 0.600     | 90.319                   | 520.337        | 1.294 | 0.015   | 0.150 | 0.776       | -0.366                       |
| 64  | positive | Gentamicin C2b                            | 0.572     | 142.638                  | 464.313        | 1.373 | 0.013   | 0.144 | 0.746       | -0.423                       |
| 65  | positive | PC(19:3(10Z,13Z,16Z)/0:0)                 | 0.569     | 139.919                  | 532.334        | 1.505 | 0.012   | 0.141 | 0.645       | -0.633                       |
| 66  | positive | 1-Oleoylglycerophosphocholine             | 0.547     | 117.136                  | 522.352        | 1.646 | 0.001   | 0.061 | 0.762       | -0.392                       |
| 67  | positive | Leu Leu Lys Glu                           | 0.534     | 132.836                  | 502.328        | 1.474 | 0.017   | 0.154 | 0.624       | -0.680                       |
| 68  | positive | 4S,5S-antillatoxin A                      | 0.512     | 136.621                  | 504.341        | 1.690 | 0.013   | 0.145 | 0.588       | -0.766                       |
| 69  | positive | Met Arg Arg Gln                           | 0.464     | 80.042                   | 590.318        | 1.330 | 0.018   | 0.154 | 0.758       | -0.399                       |
| 70  | negative | 15-deoxy-delta-12,14-PGJ2-d4              | 0.882     | 77.904                   | 319.222        | 1.644 | 0.001   | 0.007 | 0.402       | -1.314                       |

PC: Phosphatidylcholine; PE: Phosphatidylethanolamine. Red represents the concentration of metabolite in the treat group is higher than the control group, and blue represents the concentration of metabolite in the treat group is lower than the control group.



**Table S3.** Feces differential lipophilic metabolites with good matches between the treated group (50 mg/kg) and the control group.

| No. | Mode     | MS2 name                                      | MS2 score | Retention time, RT (min) | molecular mass | VIP   | P value | FDR   | Fold Change | log <sub>2</sub> Fold Change |
|-----|----------|-----------------------------------------------|-----------|--------------------------|----------------|-------|---------|-------|-------------|------------------------------|
| 1   | positive | PC(18:3(6Z,9Z,12Z)/16:0)                      | 0.924     | 567.809                  | 756.557        | 1.744 | 0.014   | 0.500 | 1.724       | 0.786                        |
| 2   | positive | PS(16:0/16:0)                                 | 0.979     | 568.440                  | 735.580        | 1.944 | 0.011   | 0.473 | 1.435       | 0.521                        |
| 3   | positive | TG(18:2(9Z,12Z)/16:0/20:5(5Z,8Z,11Z,14Z,17Z)) | 0.482     | 736.419                  | 876.732        | 2.338 | 0.002   | 0.236 | 2.557       | 1.355                        |
| 4   | negative | LysoPA(18:1(9Z)/0:0)                          | 0.925     | 135.437                  | 434.268        | 1.911 | 0.015   | 0.211 | 0.657       | -0.606                       |
| 5   | negative | PE(16:0/18:2(9Z,12Z))                         | 0.707     | 537.955                  | 715.481        | 1.703 | 0.006   | 0.198 | 0.270       | -1.887                       |
| 6   | negative | JWH 007-d9                                    | 0.686     | 41.976                   | 362.935        | 1.270 | 0.024   | 0.215 | 3.232       | 1.692                        |
| 7   | negative | 1-heptadecanoyl-sn-glycero-3-phosphocholine   | 0.524     | 289.999                  | 508.348        | 1.592 | 0.042   | 0.217 | 1.251       | 0.323                        |

PC: Phosphatidylcholine; PS: Phosphatidylserine; TG: Triacylglycerol; PE: Phosphatidylethanolamine. Red represents the concentration of metabolite in the treat group is higher than the control group, and blue represents the concentration of metabolite in the treat group is lower than the control group.

**Table S4.** Differential phosphatidylcholines (PCs) in liver, serum and feces between the treated group (50 mg/kg) and the control group.

| Sample | MS2 name                                            | MS2 score | Retention      | molecular | Mean control | Mean treat | Fold Change |
|--------|-----------------------------------------------------|-----------|----------------|-----------|--------------|------------|-------------|
|        |                                                     |           | time, RT (min) | mass, mz  |              |            |             |
| liver  | PC(22:6(4Z,7Z,10Z,13Z,16Z,19Z)/20:3(5Z,8Z,11Z))     | 0.989     | 463.1          | 856.6     | 0.00009      | 0.00013    | 1.418       |
| liver  | PC(22:6(4Z,7Z,10Z,13Z,16Z,19Z)/20:4(5Z,8Z,11Z,14Z)) | 0.984     | 464.1          | 854.6     | 0.00053      | 0.00073    | 1.398       |
| liver  | PC(O-16:1(11Z)/2:0)                                 | 0.979     | 113.2          | 522.4     | 0.00707      | 0.00492    | 0.696       |
| liver  | PC(20:3(8Z,11Z,14Z)/0:0)                            | 0.931     | 85.3           | 546.3     | 0.00261      | 0.00185    | 0.710       |
| liver  | PC(O-18:2(9Z,12Z)/2:0)                              | 0.806     | 120.7          | 548.4     | 0.00065      | 0.00043    | 0.662       |
| serum  | PC(22:4(7Z,10Z,13Z,16Z)/14:0)                       | 0.995     | 609.0          | 782.6     | 0.01964      | 0.03044    | 1.550       |
| serum  | PC(22:4(7Z,10Z,13Z,16Z)/16:0)                       | 0.993     | 650.9          | 810.6     | 0.01619      | 0.02182    | 1.347       |
| serum  | PC(O-18:2(9Z,12Z)/0:0)[U]                           | 0.991     | 169.6          | 506.4     | 0.00009      | 0.00008    | 0.836       |
| serum  | PC(19:1(9Z)/17:2(9Z,12Z))                           | 0.991     | 618.8          | 784.6     | 0.00747      | 0.00879    | 1.178       |
| serum  | PC(22:1(11Z)/12:0)                                  | 0.989     | 648.7          | 760.6     | 0.00555      | 0.00640    | 1.153       |
| serum  | PC(20:1(11Z)/12:0)                                  | 0.988     | 611.0          | 732.6     | 0.00027      | 0.00037    | 1.383       |
| serum  | PC(24:1(15Z)/18:4(6Z,9Z,12Z,15Z))                   | 0.988     | 670.5          | 864.6     | 0.00009      | 0.00018    | 2.020       |
| serum  | PC(O-16:0/2:0)                                      | 0.987     | 169.2          | 524.4     | 0.05050      | 0.04189    | 0.829       |
| serum  | PC(18:0/14:0)                                       | 0.985     | 652.9          | 734.6     | 0.00098      | 0.00134    | 1.360       |
| serum  | PC(18:2(9Z,12Z)/22:1(11Z))                          | 0.984     | 672.8          | 840.6     | 0.00021      | 0.00029    | 1.401       |
| serum  | PC(24:1(15Z)/18:3(6Z,9Z,12Z))                       | 0.981     | 690.2          | 866.7     | 0.00009      | 0.00013    | 1.551       |
| serum  | PC(22:1(11Z)/20:5(5Z,8Z,11Z,14Z,17Z))               | 0.980     | 660.1          | 862.6     | 0.00015      | 0.00018    | 1.219       |
| serum  | PC(22:2(13Z,16Z)/17:2(9Z,12Z))                      | 0.977     | 662.1          | 824.6     | 0.00066      | 0.00102    | 1.562       |
| serum  | PC(20:3(8Z,11Z,14Z)/17:1(9Z))                       | 0.974     | 636.9          | 796.6     | 0.00176      | 0.00238    | 1.349       |
| serum  | PC(O-16:0/3:1(2E))                                  | 0.967     | 139.6          | 536.4     | 0.00024      | 0.00015    | 0.644       |
| serum  | PC(20:3(8Z,11Z,14Z)/0:0)                            | 0.940     | 91.7           | 546.3     | 0.00170      | 0.00106    | 0.625       |
| serum  | PC(22:6(4E,7E,10E,13E,16E,19E)/0:0)[U]              | 0.888     | 78.9           | 568.3     | 0.00228      | 0.00166    | 0.730       |
| serum  | PC(22:5(4Z,7Z,10Z,13Z,16Z)/20:2(11Z,14Z))           | 0.855     | 640.5          | 860.6     | 0.00028      | 0.00038    | 1.352       |
| serum  | PC(22:6(4Z,7Z,10Z,13Z,16Z,19Z)/19:1(9Z))            | 0.853     | 665.9          | 846.6     | 0.00010      | 0.00014    | 1.398       |
| serum  | PC(22:6(4Z,7Z,10Z,13Z,16Z,19Z)/19:0)                | 0.836     | 656.4          | 848.6     | 0.00017      | 0.00021    | 1.244       |
| serum  | PC(24:1(15Z)/22:4(7Z,10Z,13Z,16Z))                  | 0.820     | 717.8          | 920.7     | 0.00003      | 0.00006    | 2.024       |
| serum  | PC(24:0/20:5(5Z,8Z,11Z,14Z,17Z))                    | 0.743     | 693.7          | 892.7     | 0.00005      | 0.00014    | 2.779       |
| serum  | PC(P-15:0/0:0)                                      | 0.720     | 209.3          | 466.3     | 0.00006      | 0.00004    | 0.632       |
| serum  | PC(22:6(4Z,7Z,10Z,13Z,16Z,19Z)/15:1(9Z))            | 0.712     | 557.8          | 790.5     | 0.00002      | 0.00004    | 2.013       |
| serum  | PC(O-16:0/15:0)                                     | 0.670     | 609.9          | 706.6     | 0.00034      | 0.00040    | 1.203       |
| serum  | PC(18:2(9Z,12Z)/0:0)                                | 0.600     | 90.3           | 520.3     | 0.01228      | 0.00953    | 0.776       |
| serum  | PC(19:3(10Z,13Z,16Z)/0:0)                           | 0.569     | 139.9          | 532.3     | 0.00048      | 0.00031    | 0.645       |
| feces  | PC(18:3(6Z,9Z,12Z)/16:0)                            | 0.924     | 567.8          | 756.6     | 0.00062      | 0.00107    | 1.724       |
